# Supplementary material for: New fluorescent zinc complexes: towards specific sensors for hydrogen sulfide in solution
Source: Royal Society of Chemistry journal article supplement (doi:10.1039/b907115f), 2009-01-01

## Supporting Information for “New Fluorescent Zinc Complexes: Towards Specific Sensor for Hydrogen Sulfide in Solution.”

*Erwan Galardon\*, Alain Tomas, Pascal Roussel, and Isabelle Artaud*

**Figure S1.**  $^1\text{H}$  NMR spectrum of complex **2** recorded at 250 MHz in  $\text{CDCl}_3$ . Signals indicated by \* are corresponding to the protons from MUS.

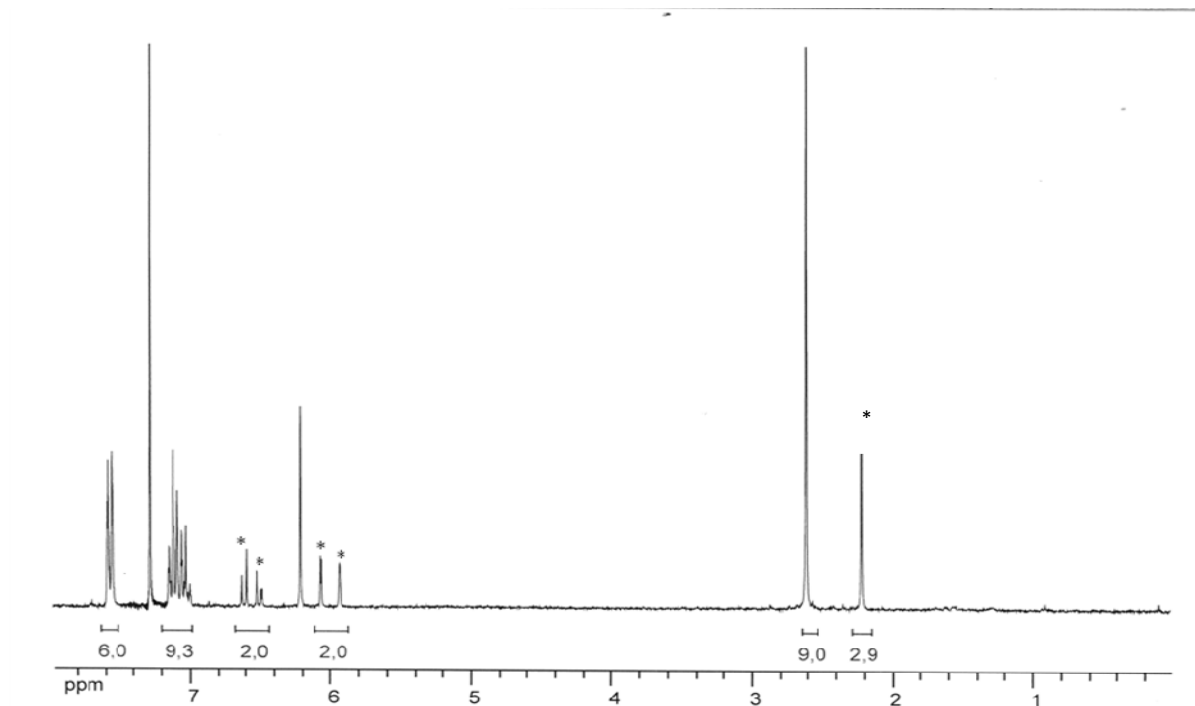

**Figure S2.**  $^1\text{H}$  NMR spectrum of complex **1** recorded at 300 K (bottom) and 220 K (top) at 500 MHz in  $\text{CDCl}_3$ . Signals indicated by \* are corresponding to the protons from MU.

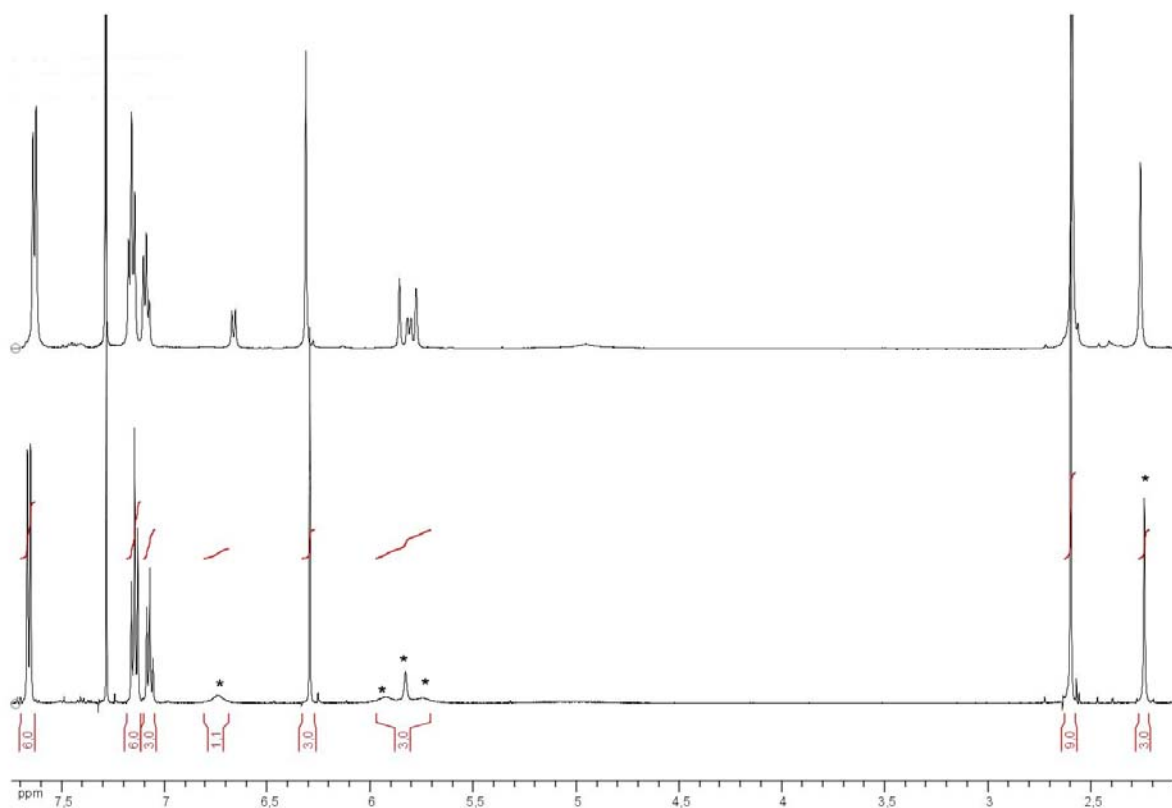

**Figure S3.** UV-Vis. spectra of complex **1** (—) and MUH (----) recorded in acetone / Hepes at 293 K ( $c = 8.10^{-5}\text{M}$ ).

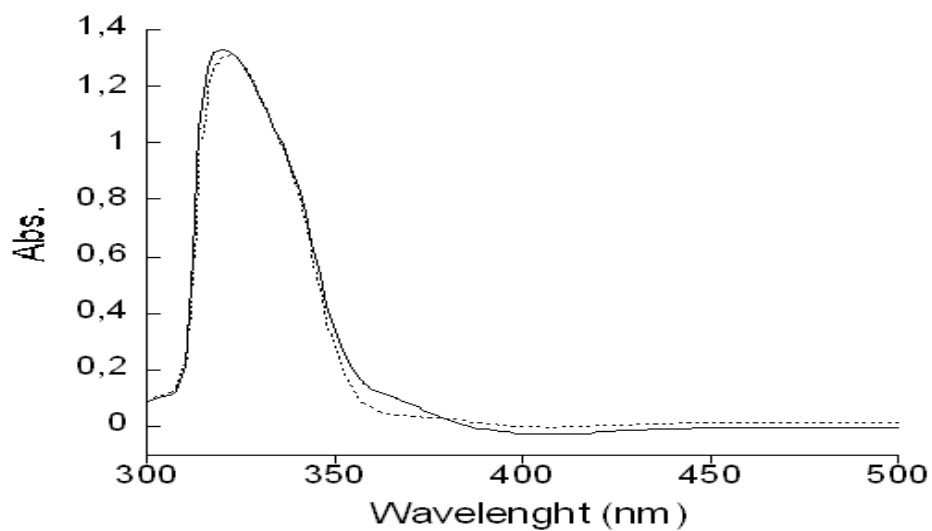

Supplement: b907115f.pdf [file b907115f.pdf]
